# Supplementary material for: A rose bengal-functionalized porous organic polymer for carboxylative cyclization of propargyl alcohols with CO2
Source: Royal Society of Chemistry journal article supplement (doi:10.1039/c9cc07043e), 2019-01-01

## Supporting Information

### Rose Bengal-Functionalized Porous Organic Polymer for Carboxylative Cyclization of Propargyl Alcohols with CO<sub>2</sub>

Xiaoxiao Yu,<sup>a, b</sup> Zhenzhen Yang,<sup>a</sup> Fengtao Zhang,<sup>a, b</sup> Zhenghui Liu,<sup>a, b</sup> Peng Yang,<sup>a, b</sup> Hongye Zhang,<sup>a</sup> Bo Yu,<sup>a</sup> Yanfei Zhao,<sup>a</sup> and Zhimin Liu<sup>\*a, b</sup>

<sup>a</sup> Beijing National Laboratory for Molecular Sciences, Key Laboratory of Colloid, Interface and Thermodynamics, Institute of Chemistry, Chinese Academy of Sciences, Beijing 100190, China

<sup>b</sup> University of Chinese Academy of Sciences, Beijing 100049, China.

E-mail: [liuzm@iccas.ac.cn](mailto:liuzm@iccas.ac.cn)

### Table of Contents

|                                                                                                                          |    |
|--------------------------------------------------------------------------------------------------------------------------|----|
| 1. General experimental methods .....                                                                                    | 2  |
| 2. Synthetic procedures.....                                                                                             | 2  |
| 3. Supplementary Figures .....                                                                                           | 3  |
| Figure S1 .....                                                                                                          | 3  |
| Figure S2 .....                                                                                                          | 4  |
| Figure S3 .....                                                                                                          | 4  |
| Figure S4 .....                                                                                                          | 5  |
| Figure S5 .....                                                                                                          | 5  |
| Figure S6 .....                                                                                                          | 6  |
| Figure S7 .....                                                                                                          | 6  |
| Figure S8 .....                                                                                                          | 7  |
| Figure S9. ....                                                                                                          | 7  |
| Figure S10 .....                                                                                                         | 8  |
| Figure S11 .....                                                                                                         | 8  |
| Table S1.....                                                                                                            | 9  |
| 4. Characterization (NMR) of the products of carboxylative cyclization of propargyl alcohols with CO <sub>2</sub> . .... | 10 |

# 1. General experimental methods

## Materials

All reagents and solvents were purchased from commercial sources and were used without further purification, unless indicated otherwise.

## Instrumentation

Liquid  $^1\text{H}$  and  $^{13}\text{C}$  NMR spectra were recorded on Bruker 400 spectrometer. Solid-state NMR experiments were performed on a Bruker WB Avance II 400 MHz spectrometer. The  $^{13}\text{C}$  CP/MAS NMR spectra were recorded with a 4-mm double-resonance MAS probe and with a sample spinning rate of 10.0 kHz; a contact time of 2 ms (ramp 100) and pulse delay of 3 s were applied. FTIR spectra of the samples were collected on a TENSOR 27 FTIR at a resolution of  $2\text{ cm}^{-1}$ . Gas sorption isotherms were obtained with Micromeritics TriStar II 3020 and Micromeritics ASAP 2020 M+C accelerated surface area and porosimetry analyzers at certain temperature. The samples were outgassed at  $140\text{ }^\circ\text{C}$  for 8 h before the measurements. Surface areas were calculated from the adsorption data using Brunauer-Emmett-Teller (BET) methods. The pore-size-distribution curves were obtained from the adsorption branches using non-local density functional theory (NLDFT) method. Field emission scanning electron microscopy (SEM) observations were performed on a Hitachi SU8020 microscope operated at an accelerating voltage of 15.0 kV. (HR) Transmission electron microscopy (TEM) images were obtained with a JEOL JEM-1011 and JEM-2100F instrument operated at 200 kV. The thermal properties of the materials were evaluated using a thermogravimetric analysis (TGA) instrument (STA PT1600 Linseis) over the temperature range of 25 to  $800\text{ }^\circ\text{C}$  under air with a heating rate of  $10\text{ }^\circ\text{C}/\text{min}$ . The content of Ag in the **Ag@RB-POP** was determined by inductively coupled plasma atomic emission spectroscopy (ICP-AES VISTA-MPX). X-ray photoelectron spectroscopy (XPS) was performed on an ESCAL Lab 220i-XL spectrometer at a pressure of  $\sim 3 \times 10^{-9}$  mbar (1 mbar = 100 Pa) using Al K $\alpha$  as the excitation source (1486.6 eV) and operated at 15 kV and 20 mA. The binding energies were referenced to the C $_{1s}$  line at 284.8 eV from adventitious carbon. The XRD analysis was performed on a D/MAX-RC diffractometer operating at 30 kV and 100 mA with CuK $\alpha$  radiation.

# 2. Synthetic procedures

## (1) Synthetic procedure for RB-POP

Typically, Rose bengal (1 mmol), 1,4-diethynylbenzene (2 mmol), tetrakis(triphenylphosphine) palladium (20 mg) and cuprous iodide (10 mg) were dissolved in the mixture of 4 mL of N,N-dimethylformamide and 4 mL of triethanolamine. Then the reaction mixture was heated to  $90\text{ }^\circ\text{C}$  and stirred for 72 h under a nitrogen atmosphere. After cooling down to room temperature, the solid was collected by filtration and washed with distilled water, tetrahydrofuran and ethanol for three times. After being extracted in a Soxhlet extractor with ethanol,  $\text{H}_2\text{O}$  and THF (1: 1: 1) for 48 h, **RB-POP** as deep red solid was collected and dried in vacuum oven at  $80\text{ }^\circ\text{C}$  for 24 h. The yield was 88% for **RB-POP**.

## (2) Synthetic procedure for Ag@RB-POP

In a round-bottom flask equipped with a nitrogen inlet and a reflux condenser,  $\text{AgBF}_4$  (6 mg) dissolved in 20 mL of THF and **RB-POP** (300 mg) were added under nitrogen. The mixture was kept stirring for 24 h at  $80\text{ }^\circ\text{C}$  in dark. The resulting solid was isolated by filtration and washed with THF, and then purified using Soxhlet extraction (THF) for 24 h. **Ag@RB-POP** was obtained as a brown

powder after drying at 80 °C under vacuum for 12 h. The **Ag@porous carbon** was prepared in the same way using various supports.

### (3) General procedure for carboxylative cyclization reaction

Typically, propargyl alcohols (i.e., **1a-1k**, 0.5 mmol), **Ag@RB-POP** (20 mg), DBU (0.5 mmol) and CH<sub>3</sub>CN (2 mL) were successively added into a stainless steel autoclave with a Teflon tube (16 mL inner volume) under N<sub>2</sub> atmosphere. The autoclave was sealed and charged with CO<sub>2</sub> up to 1 MPa at room temperature, then was moved to an oil bath of 30 °C and stirred for 12 h. After reaction, the yield of **2a-2k** were determined by NMR using mesitylene as an internal standard and CDCl<sub>3</sub> as the solvent. The pure products of **2a-2i** was obtained by column chromatography on silica gel using petroleum ether/ethyl acetate (from 10:1 to 1:1) as eluent and identified by NMR spectra.

### (4) Recycling test of Ag@RB-POP

After reaction, the catalyst was recycled by filtration, washed with 50 mL CH<sub>2</sub>Cl<sub>2</sub>, and then dried under vacuum at 40 °C for 24 h. The recycled catalyst was reused for the next run without further purification.

## 3. Supplementary Figures

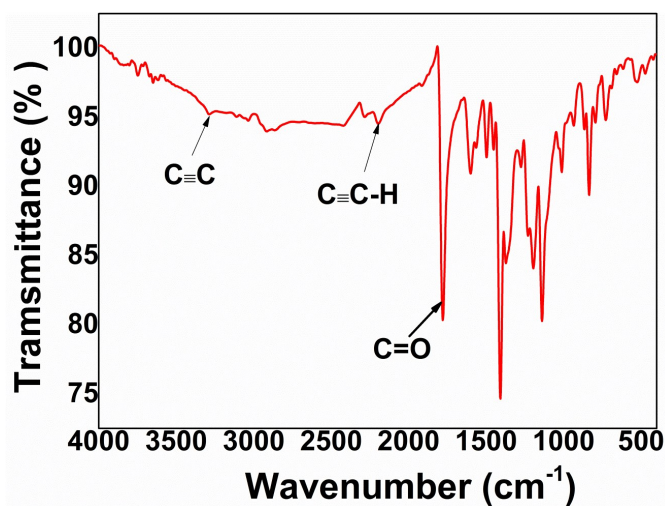

**Figure S1** FTIR spectrum of **RB-POP**. The spectrum was recorded as KBr pellets.

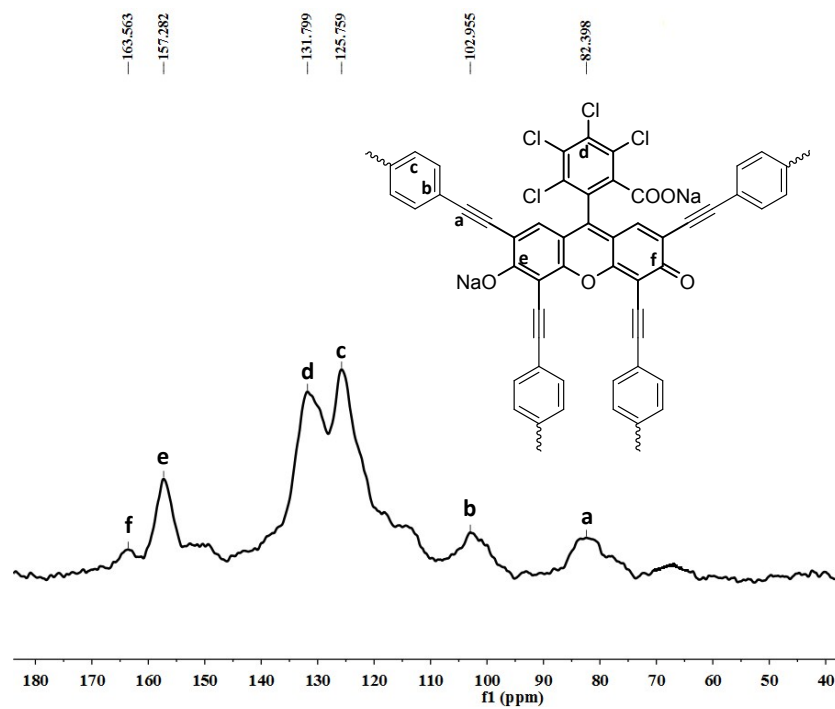

**Figure S2** CP/MAS  $^{13}\text{C}$  NMR spectrum for **RB-POP**.

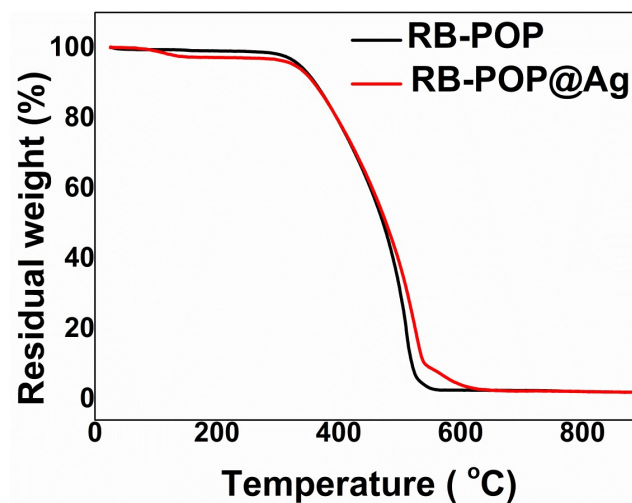

**Figure S3** TGA analysis on **RB-POP** and **Ag@RB-POP** in air, with a ramping rate of 10  $^{\circ}\text{C}$  min.

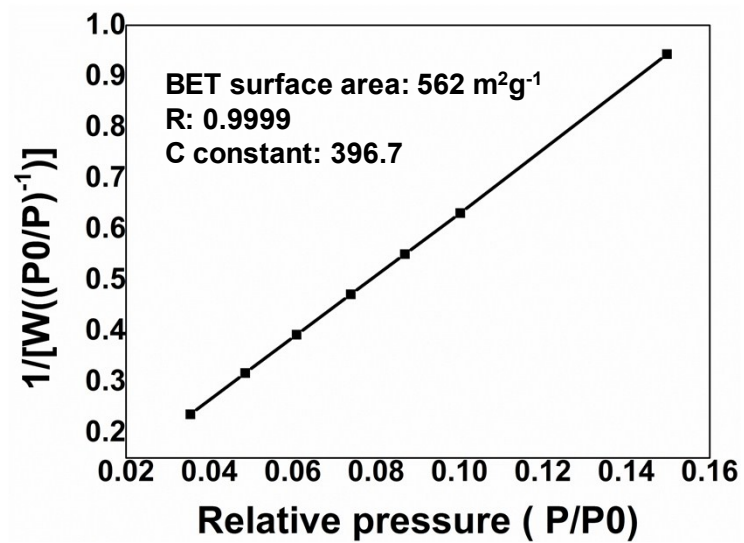

**Figure S4** BET plot of RB-POP.

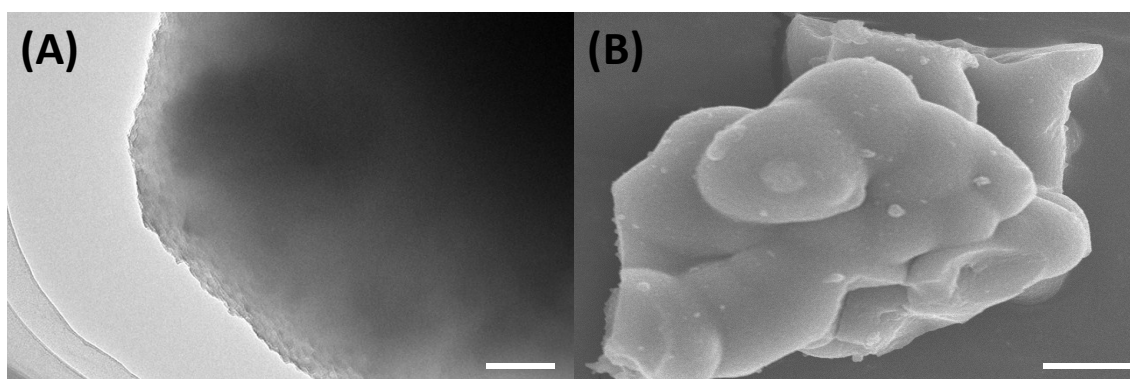

**Figure S5** (a) SEM and (b) TEM images of RB-POP. Scale bar, (a) 200 nm, (b) 20 μm.

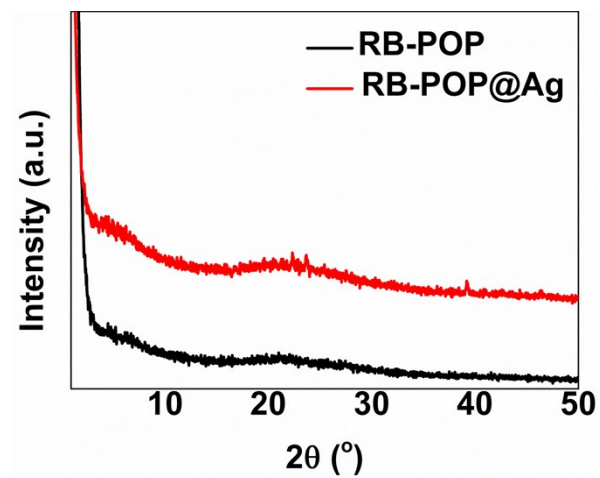

**Figure S6** PXRD-pattern of RB-POP and Ag@RB-POP.

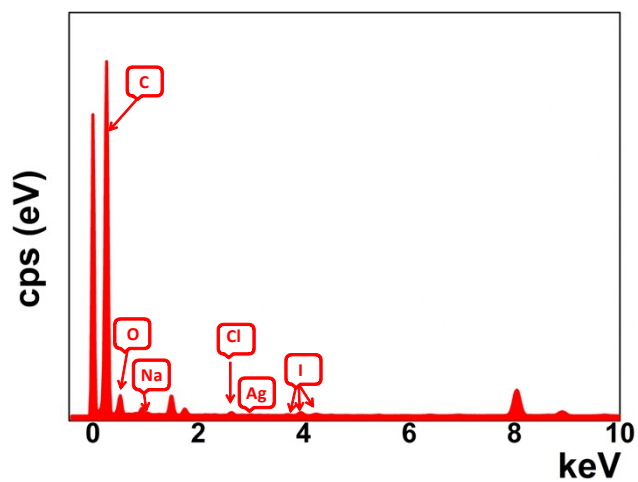

**Figure S7** EDS profile of Ag@RB-POP

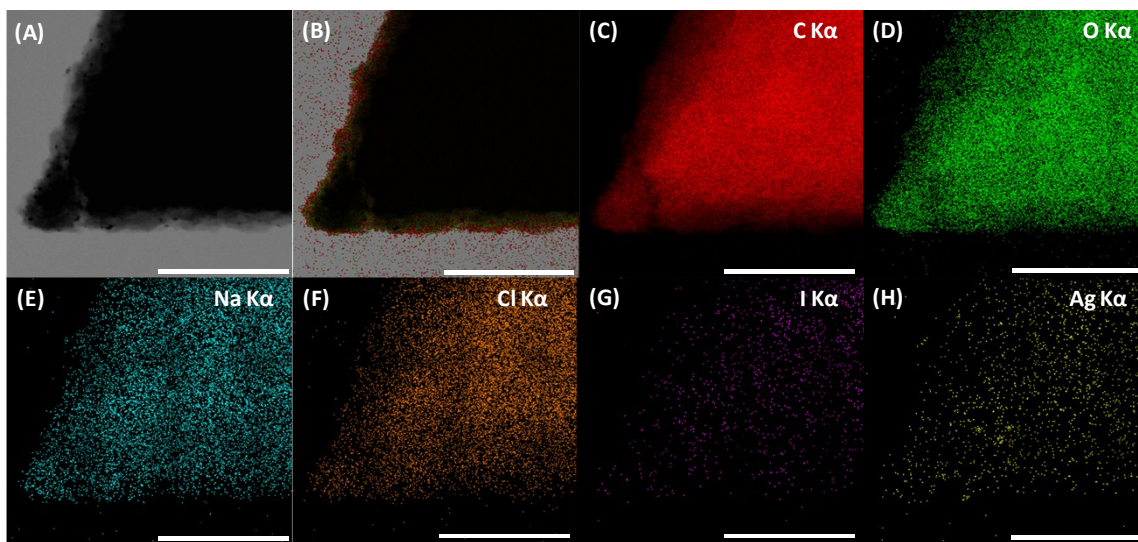

**Figure S8** (A) The(HR)TEM of Ag@RB-POP, Scale bar 200 nm, (B) to (H) are the compositional EDS mapping of Ag@RB-POP using scanning transmission electron microscopy. Scale bar 200 nm.

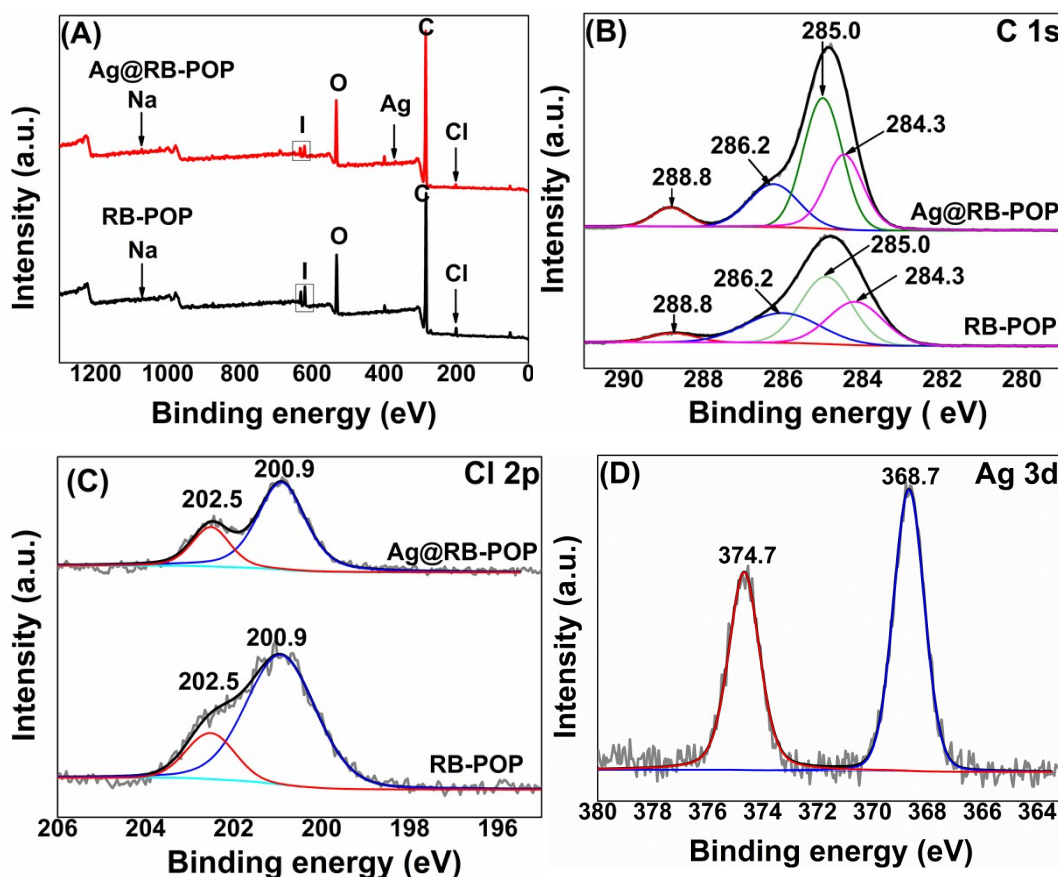

**Figure S9.** XPS spectra: (A) survey spectra, (B) C1s, (C) Cl1s for RB-POP and Ag@RB-POP (D) Ag 3d for Ag@RB-POP -After

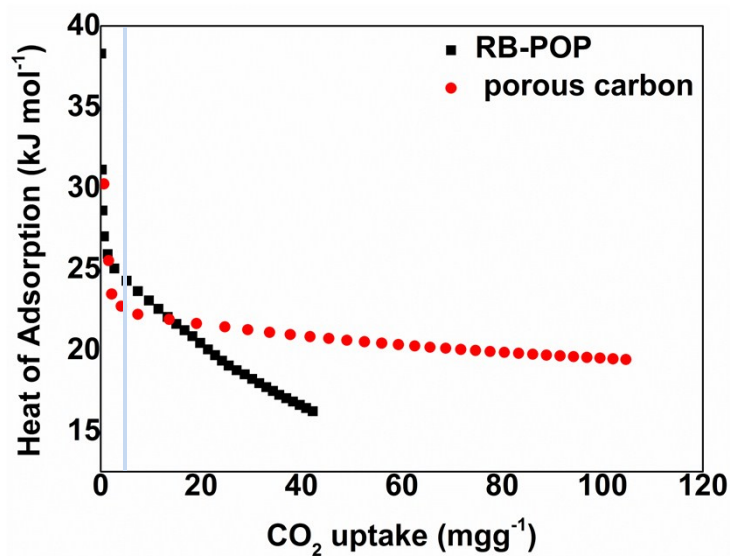

**Figure S10** Isosteric heats of adsorption ( $Q_{st}$ ) for CO<sub>2</sub> adsorption by RB-POP and porous carbon. The isosteric heats of adsorption ( $Q_{st}$ ) are calculated by fitting the CO<sub>2</sub> adsorption isotherms at 273 K and 298 K and applying of the Clausius-Clapeyron equation.

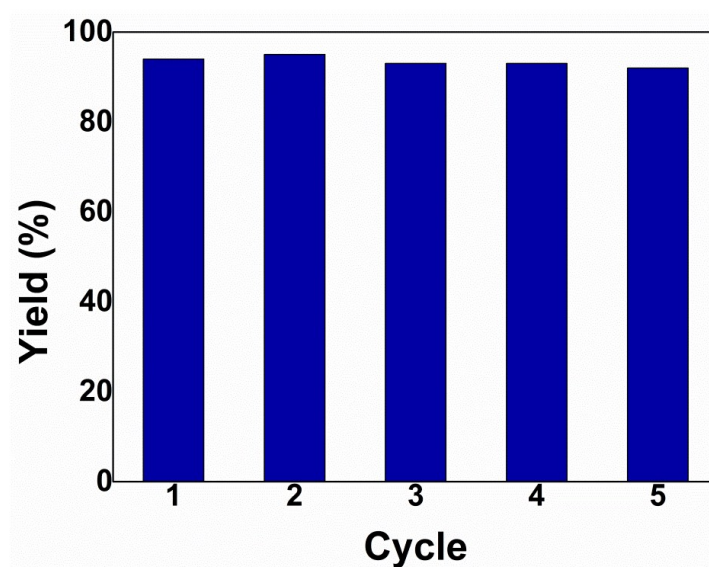

**Figure S11** Recyclability test of Ag@RB-POP. Reaction conditions: **1a**, 0.5 mmol; Ag@RB-POP, 20 mg (Ag was 0.01 mol% based on **1a**); DBU, 0.5 mmol; CO<sub>2</sub> 1 MPa; CH<sub>3</sub>CN, 2 mL; 30 °C, 12 h. <sup>b</sup> Determined by <sup>1</sup>H NMR (CDCl<sub>3</sub>, 400 MHz) using mesitylene as an internal standard.

**Table S1** Base screening<sup>a</sup>

| <div>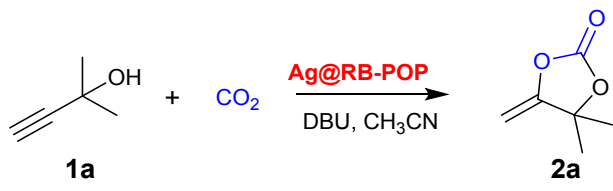</div> |                                 |                  |                      |
|-----------------------------------------------------------------------------------------------|---------------------------------|------------------|----------------------|
| Entry                                                                                         | Base                            | Catalyst         | Yield/% <sup>b</sup> |
| 1                                                                                             | DBU                             | <b>Ag@RB-POP</b> | 94                   |
| 2                                                                                             | t-BuOK                          | <b>Ag@RB-POP</b> | <1                   |
| 3                                                                                             | KOH                             | <b>Ag@RB-POP</b> | <1                   |
| 4                                                                                             | K <sub>2</sub> CO <sub>3</sub>  | <b>Ag@RB-POP</b> | 24                   |
| 5                                                                                             | K <sub>3</sub> PO <sub>4</sub>  | <b>Ag@RB-POP</b> | <1                   |
| 6                                                                                             | Cs <sub>2</sub> CO <sub>3</sub> | <b>Ag@RB-POP</b> | 56                   |

<sup>a</sup> Reaction condition: **1a**, 0.5 mmol; **Ag@ RB-POP**, 20 mg (Ag was 0.01 mol% based on **1a**); base, 0.5 mmol; CO<sub>2</sub> 1 MPa; CH<sub>3</sub>CN, 2 mL; 30 °C, 12 h. <sup>b</sup> Determined by <sup>1</sup>H NMR (CDCl<sub>3</sub>, 400 MHz) using mesitylene as an internal standard.

#### 4. Characterization (NMR) of the products of carboxylative cyclization of propargyl alcohols with CO<sub>2</sub>.

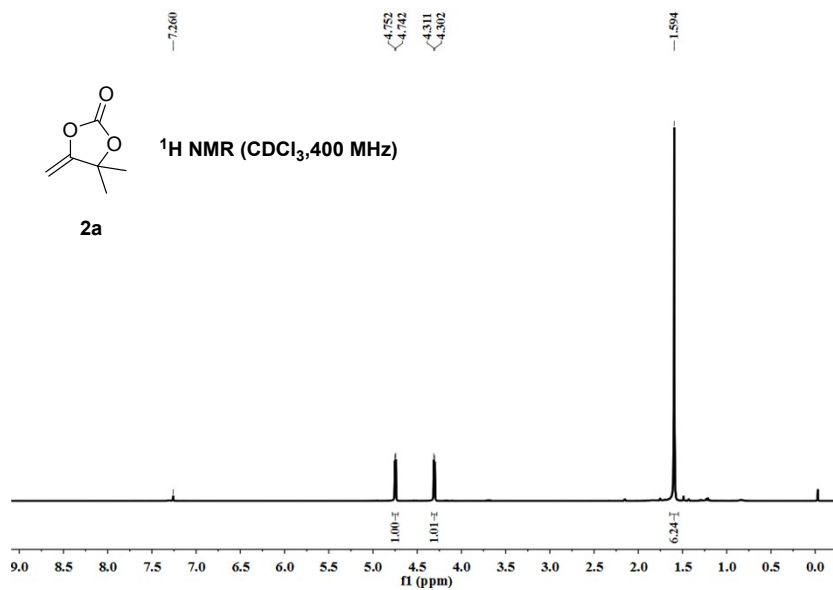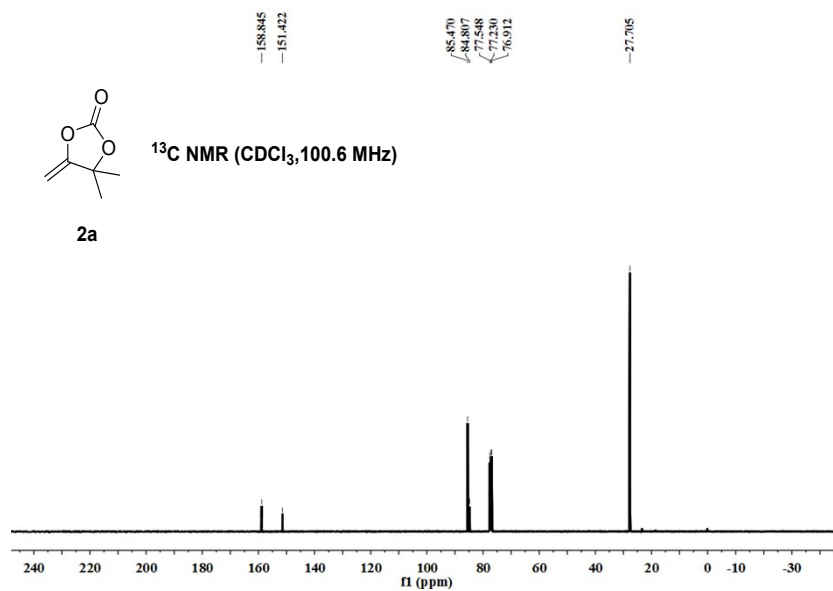

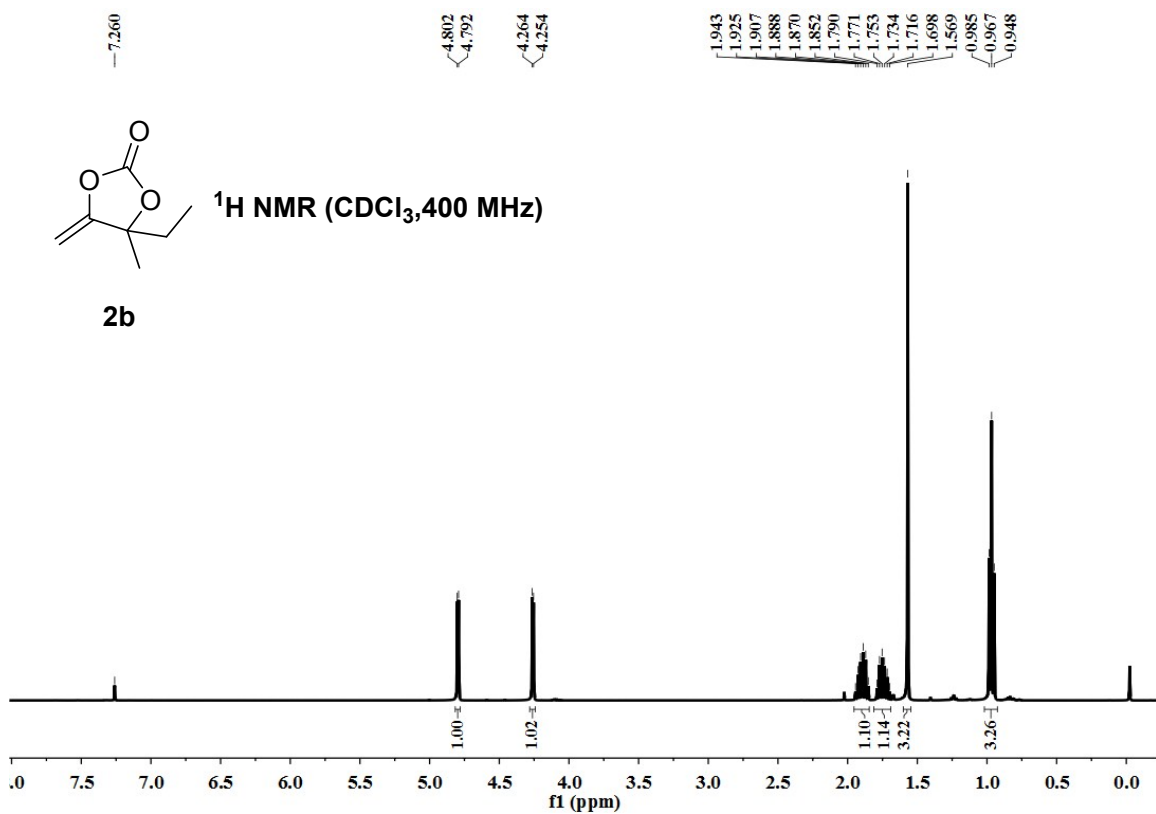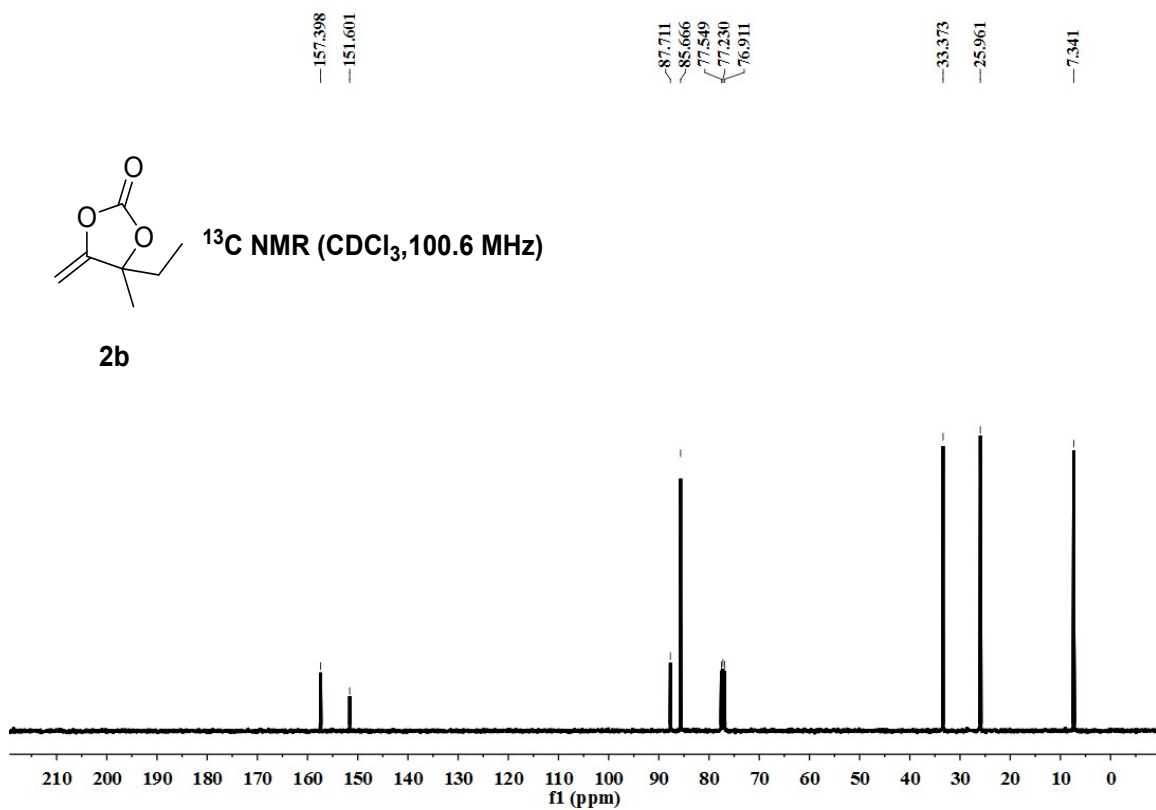

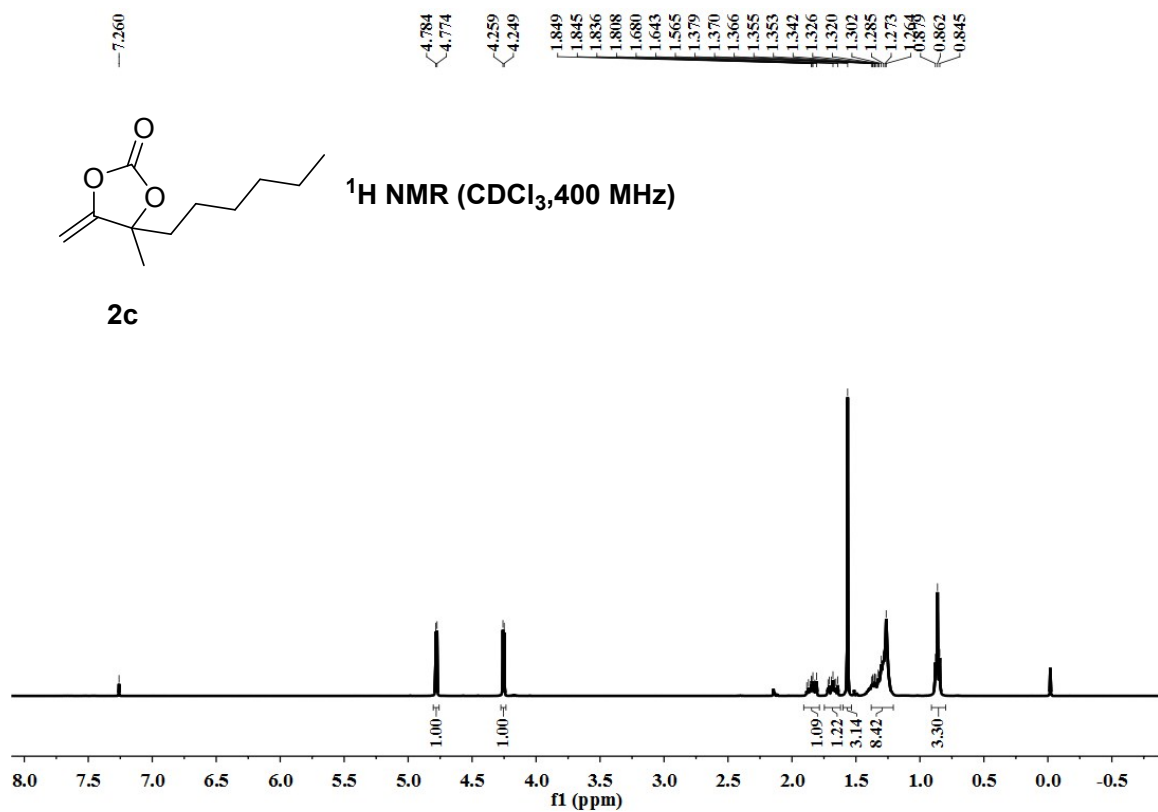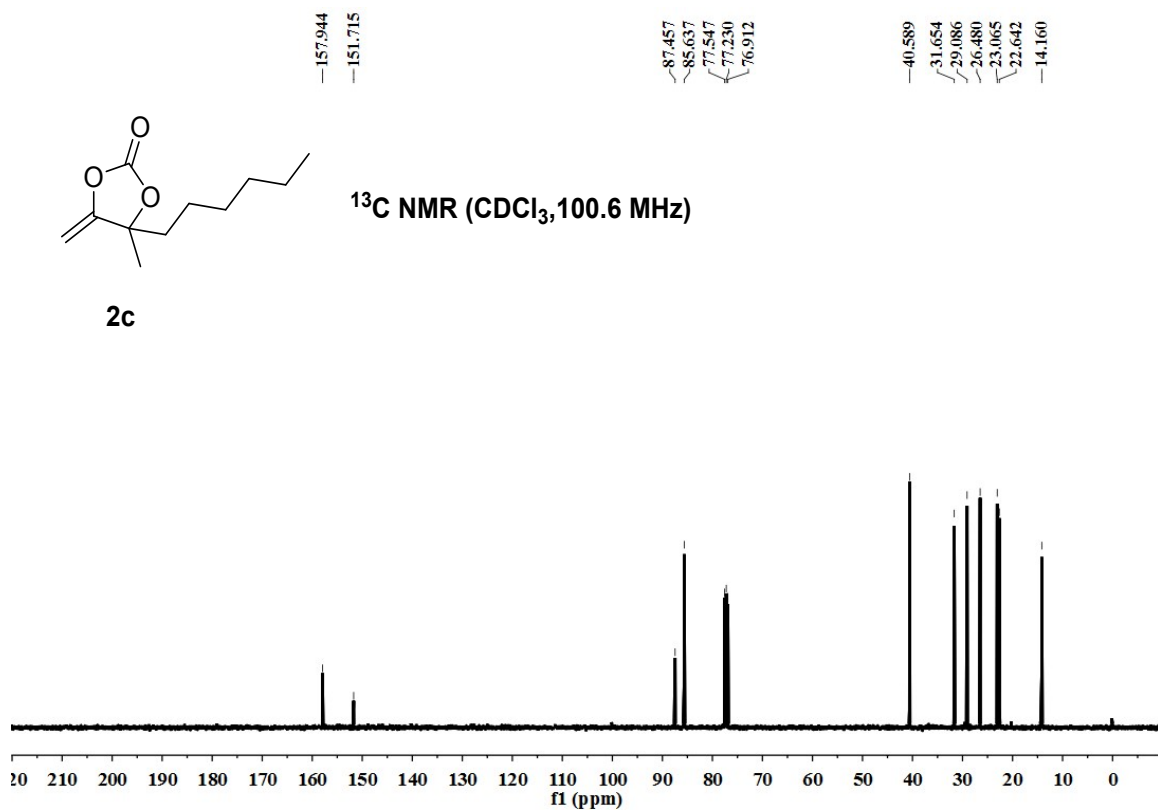

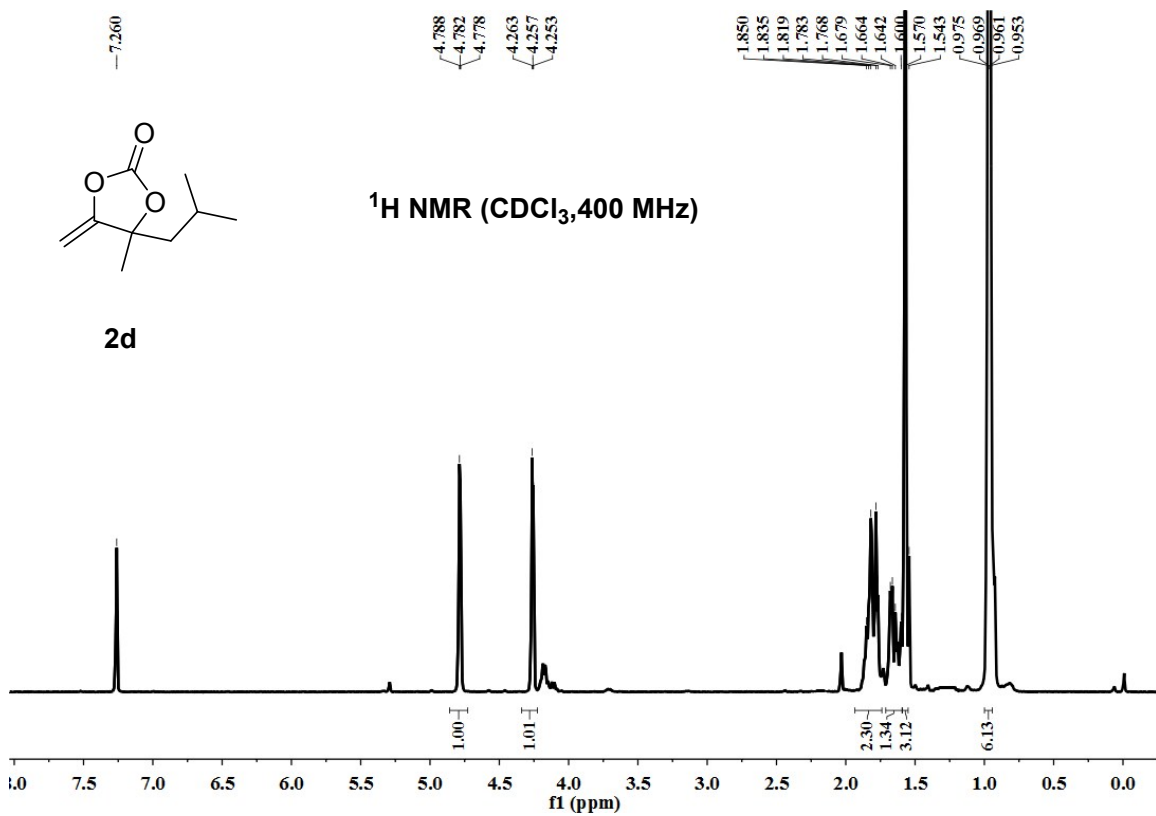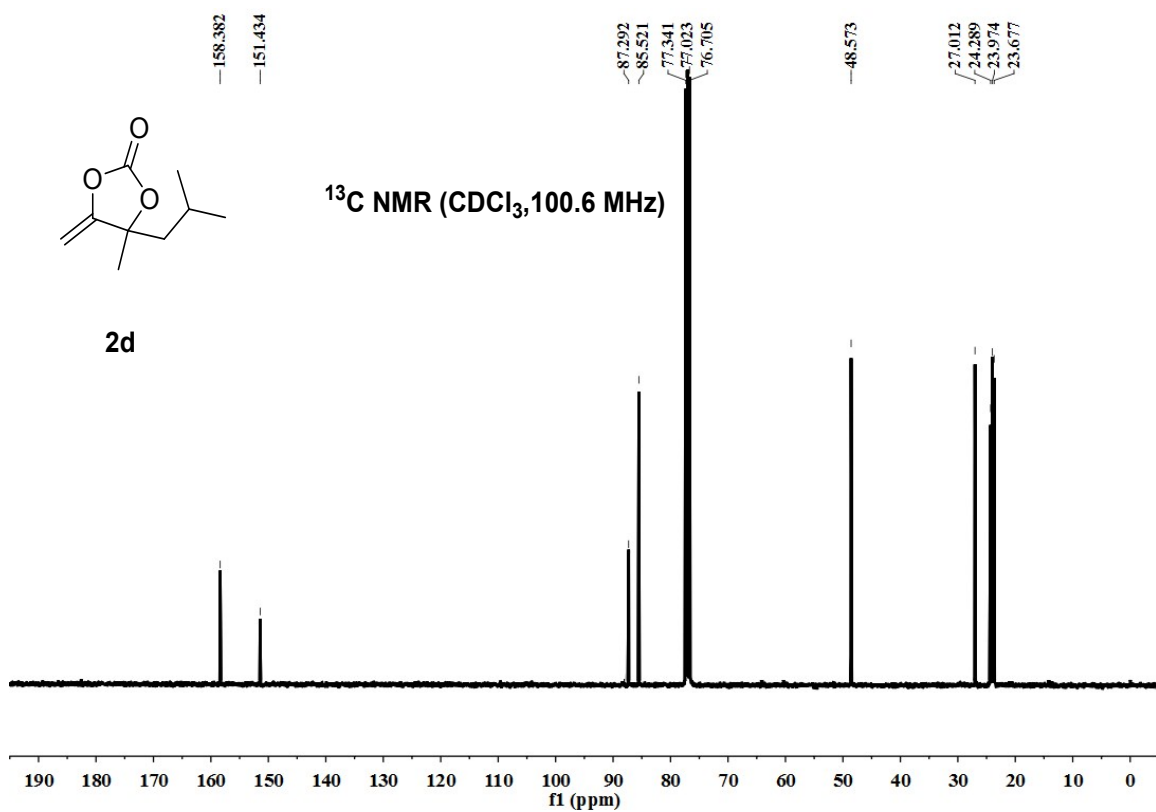

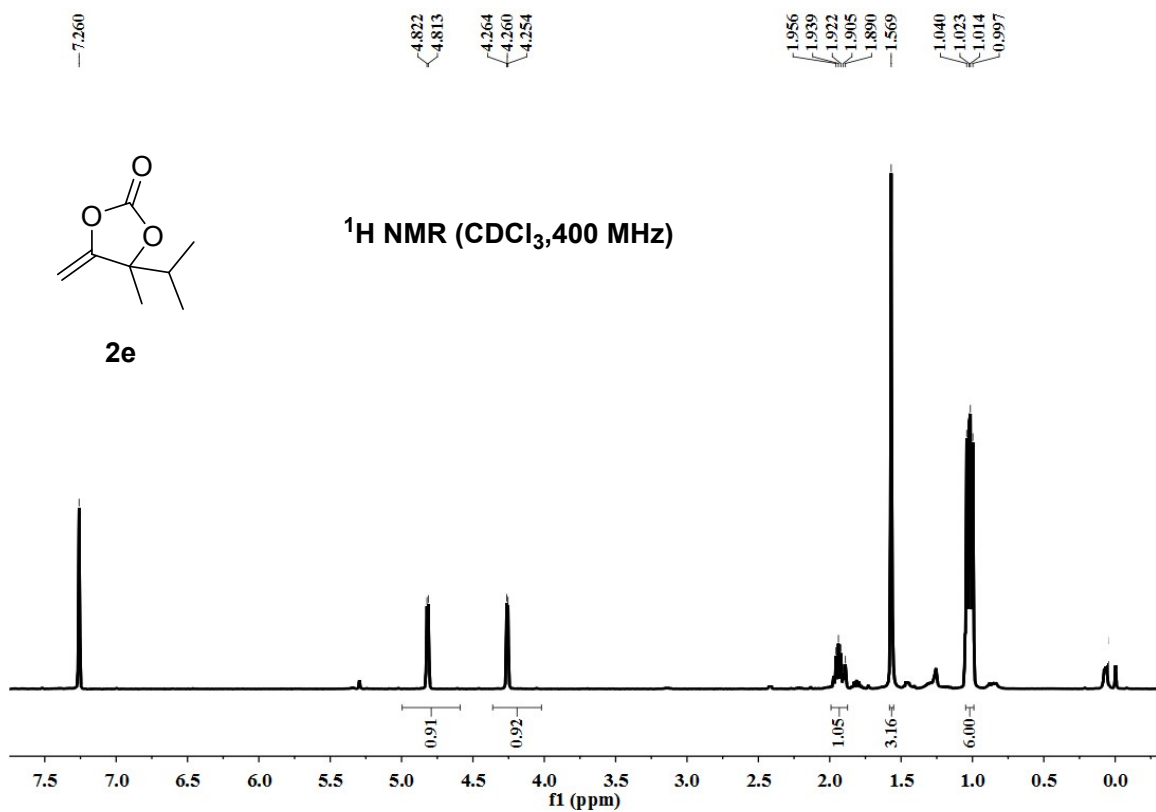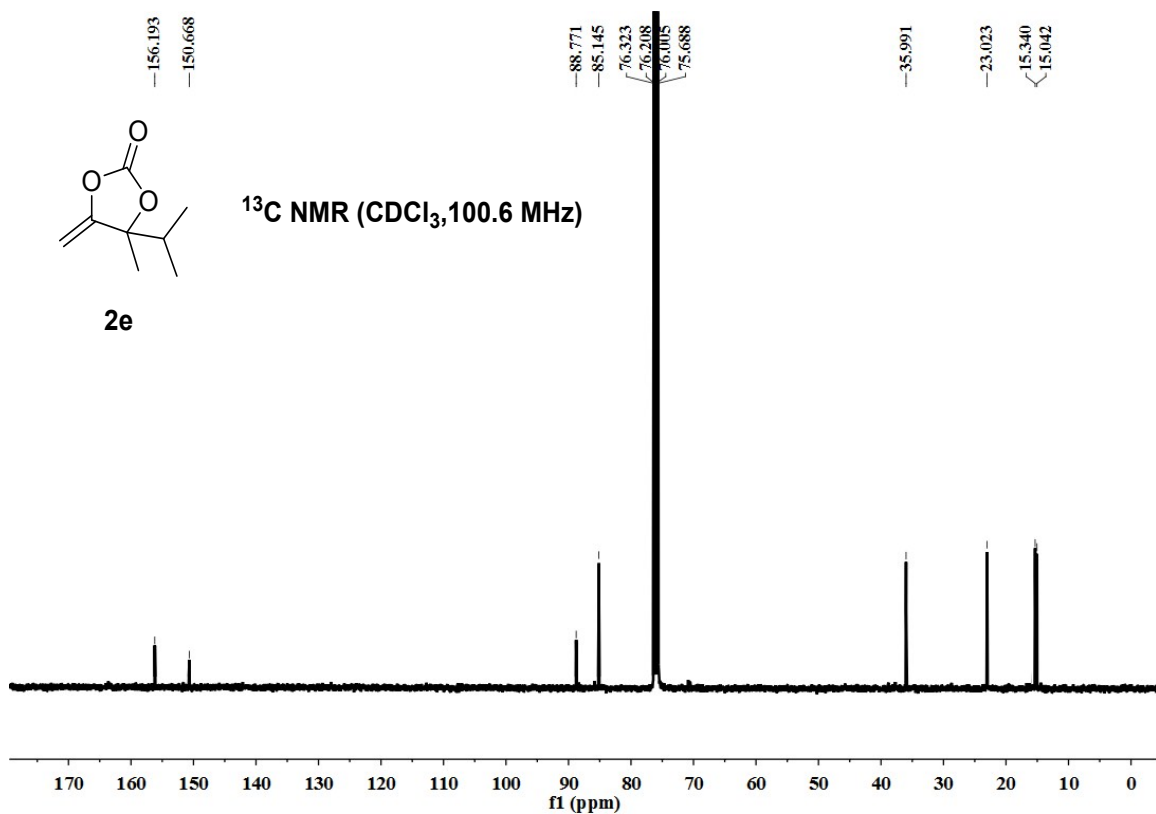

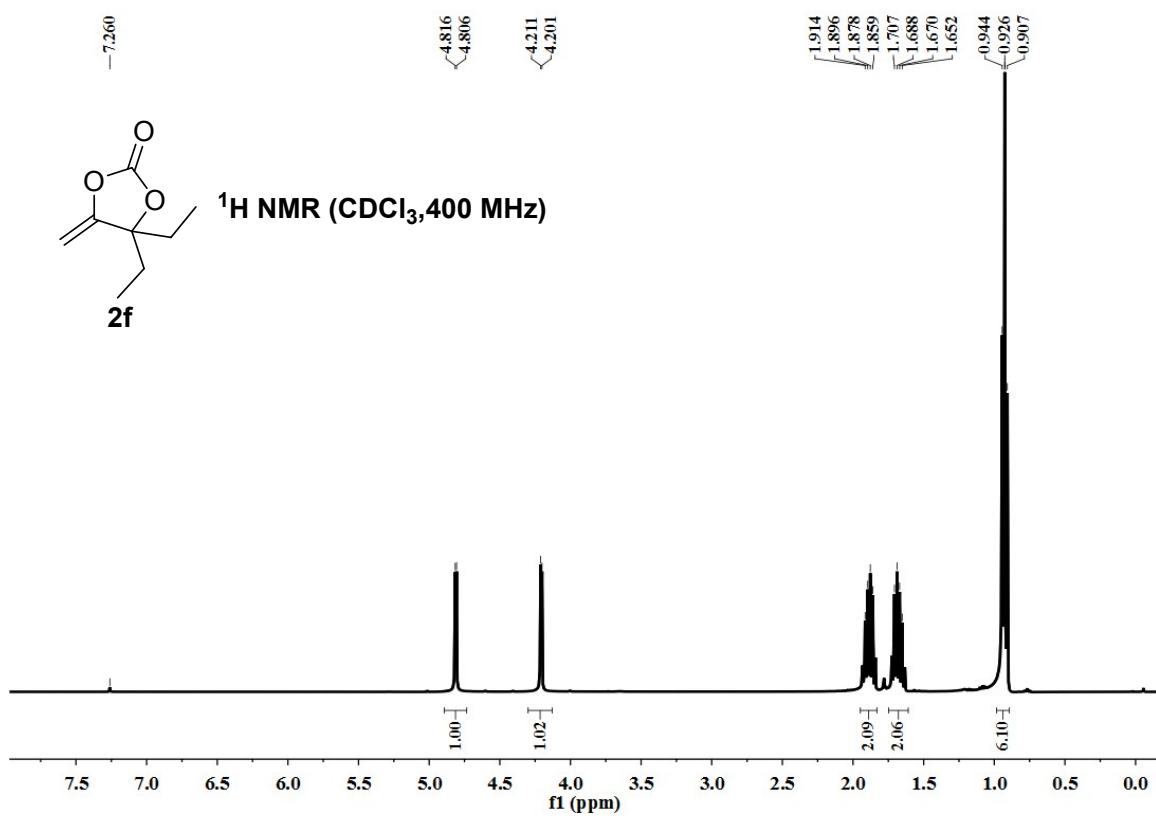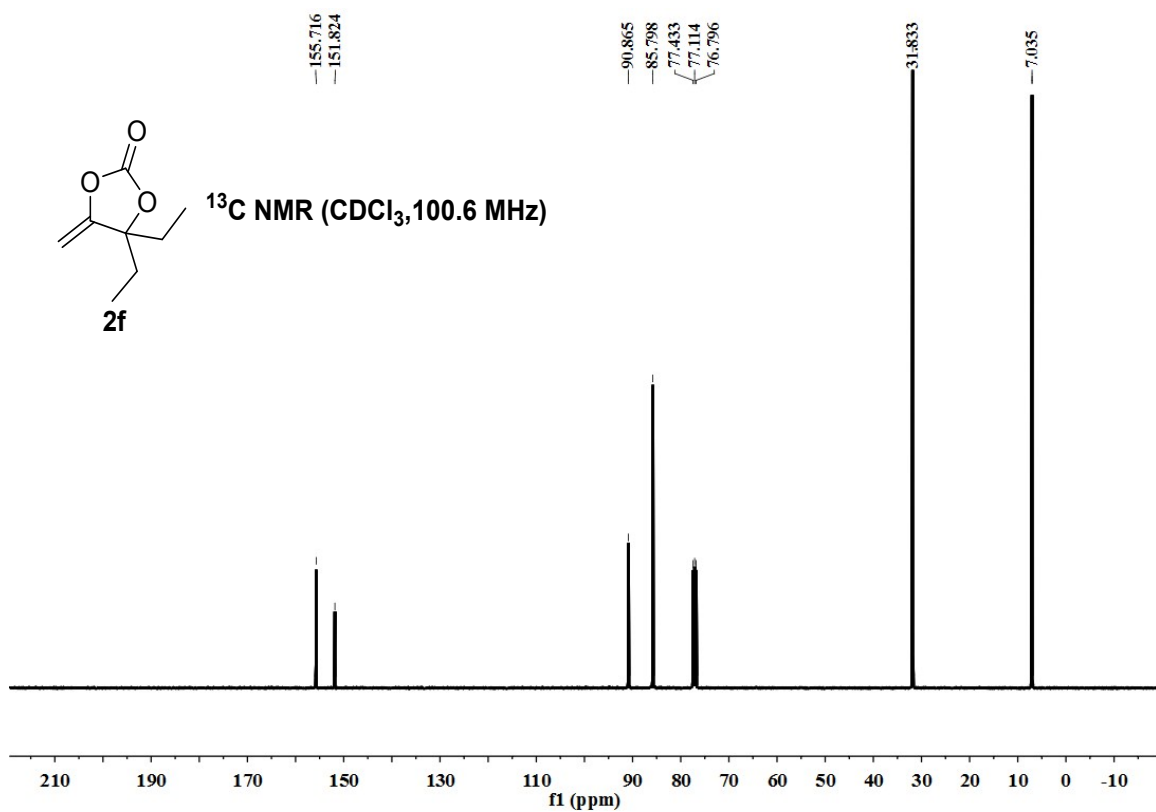

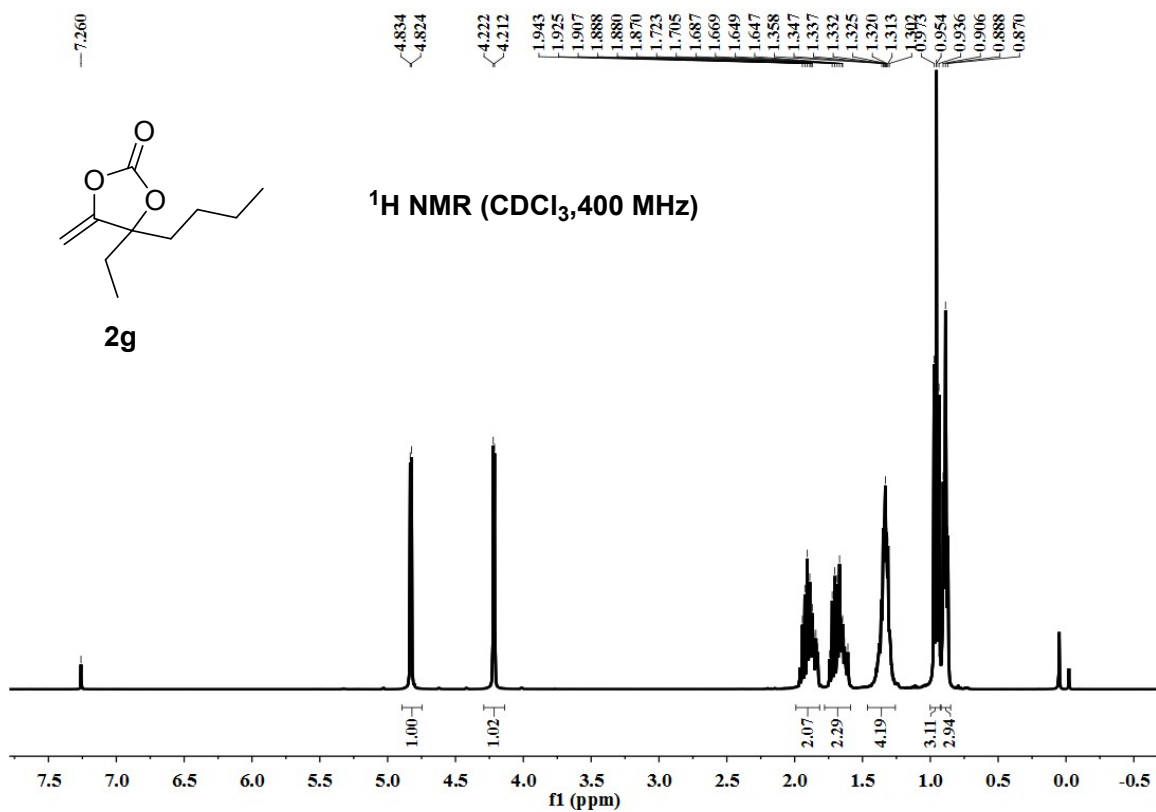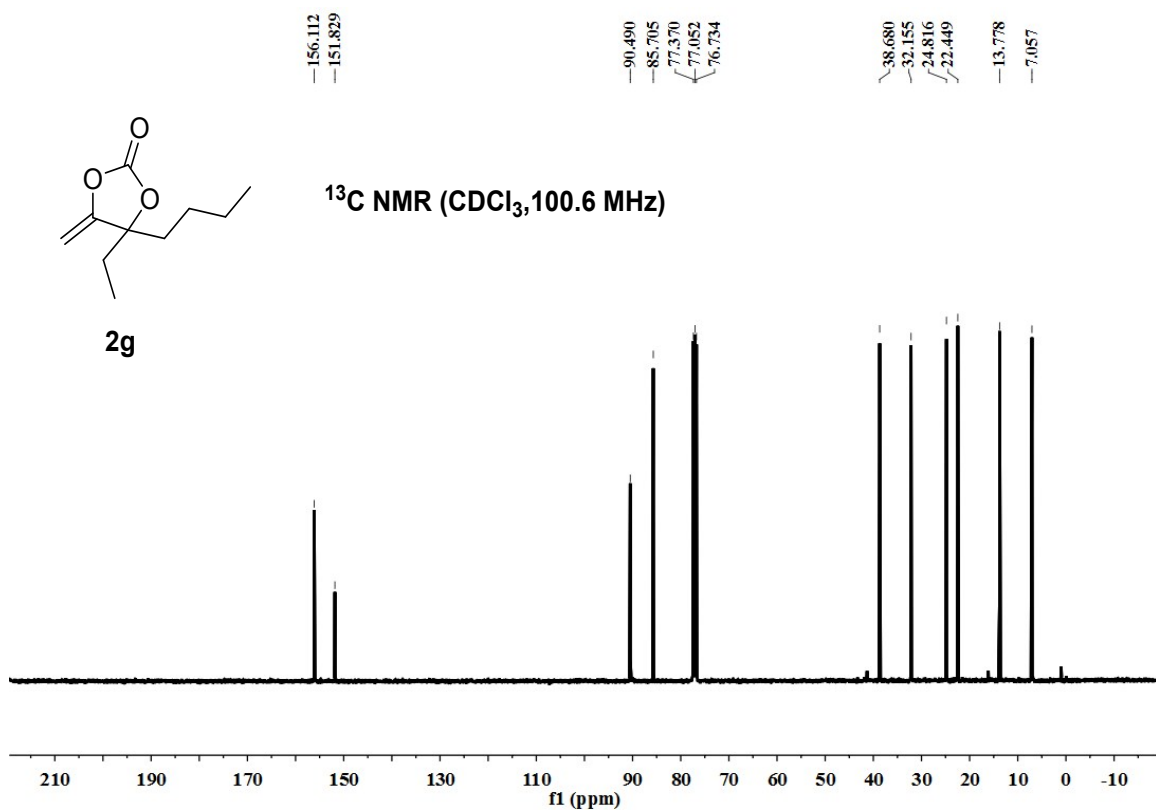

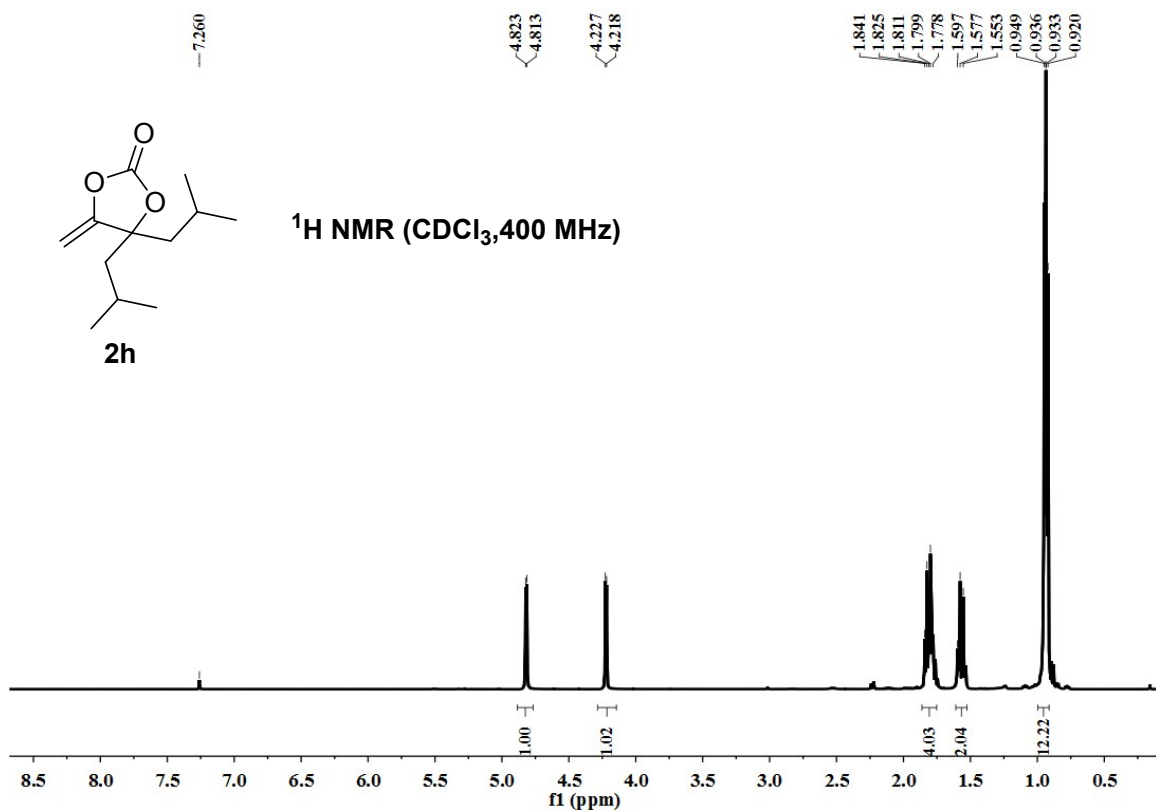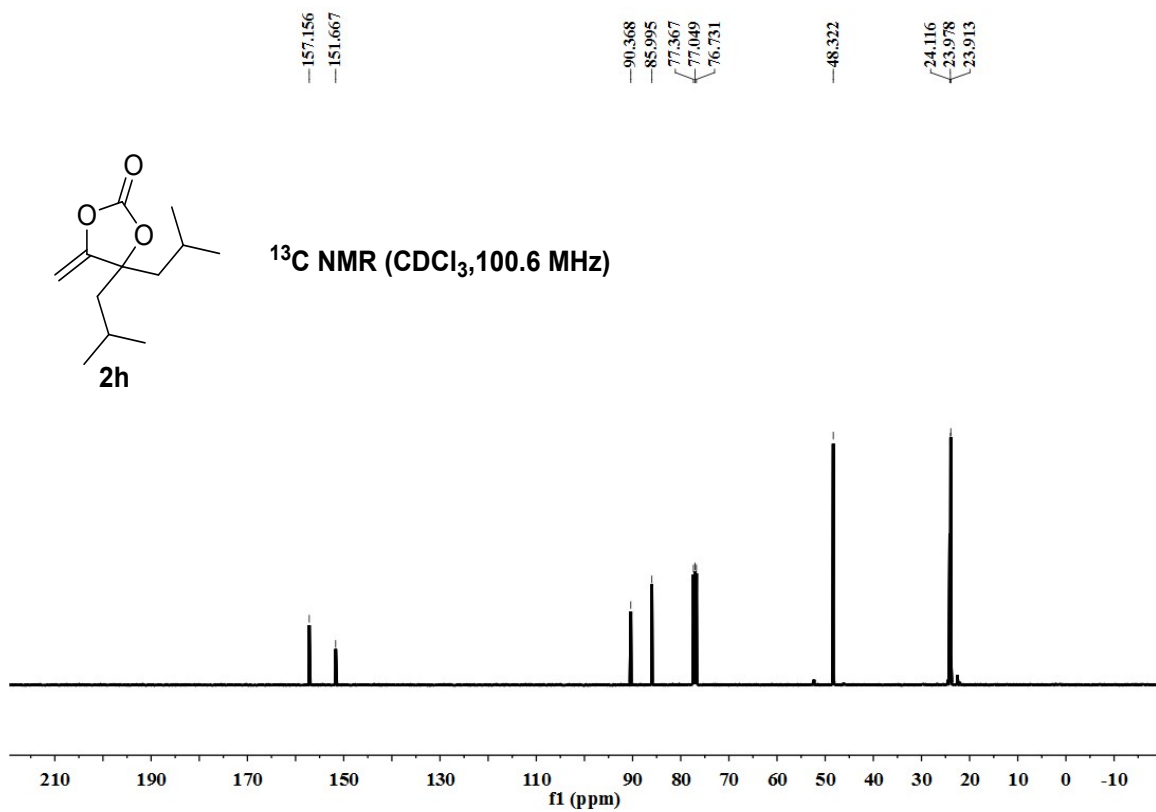

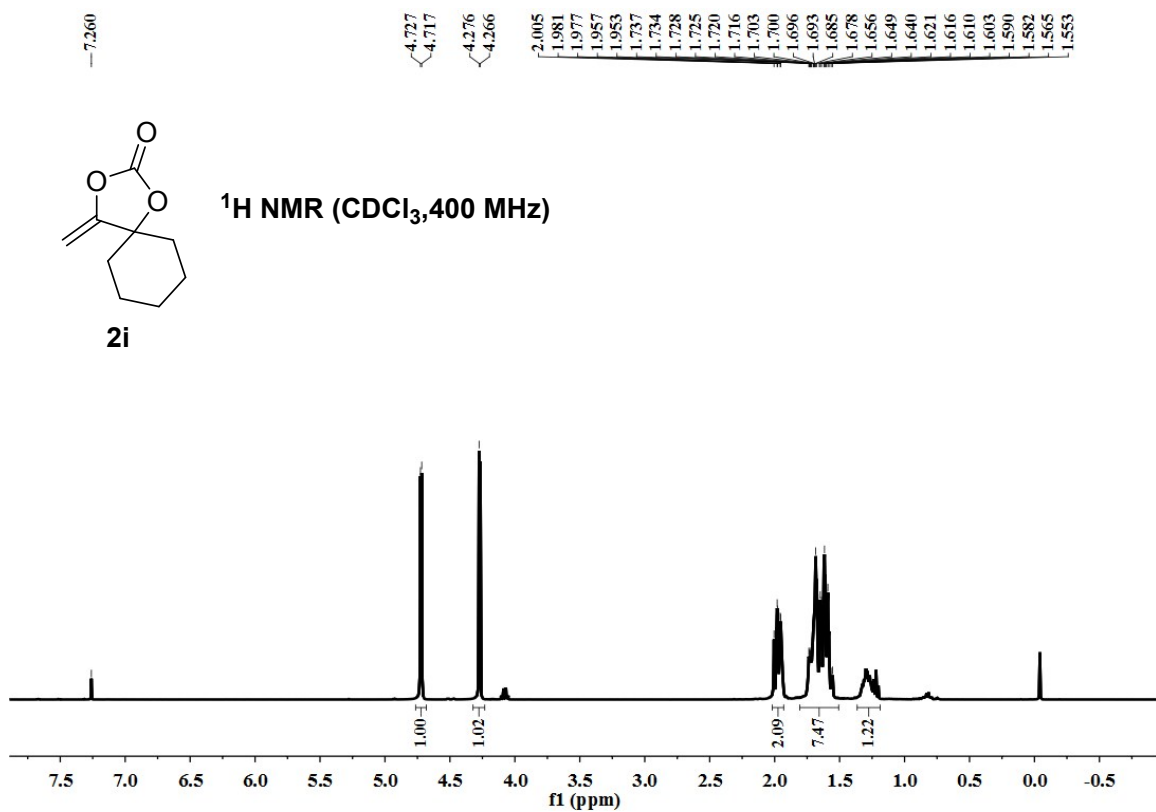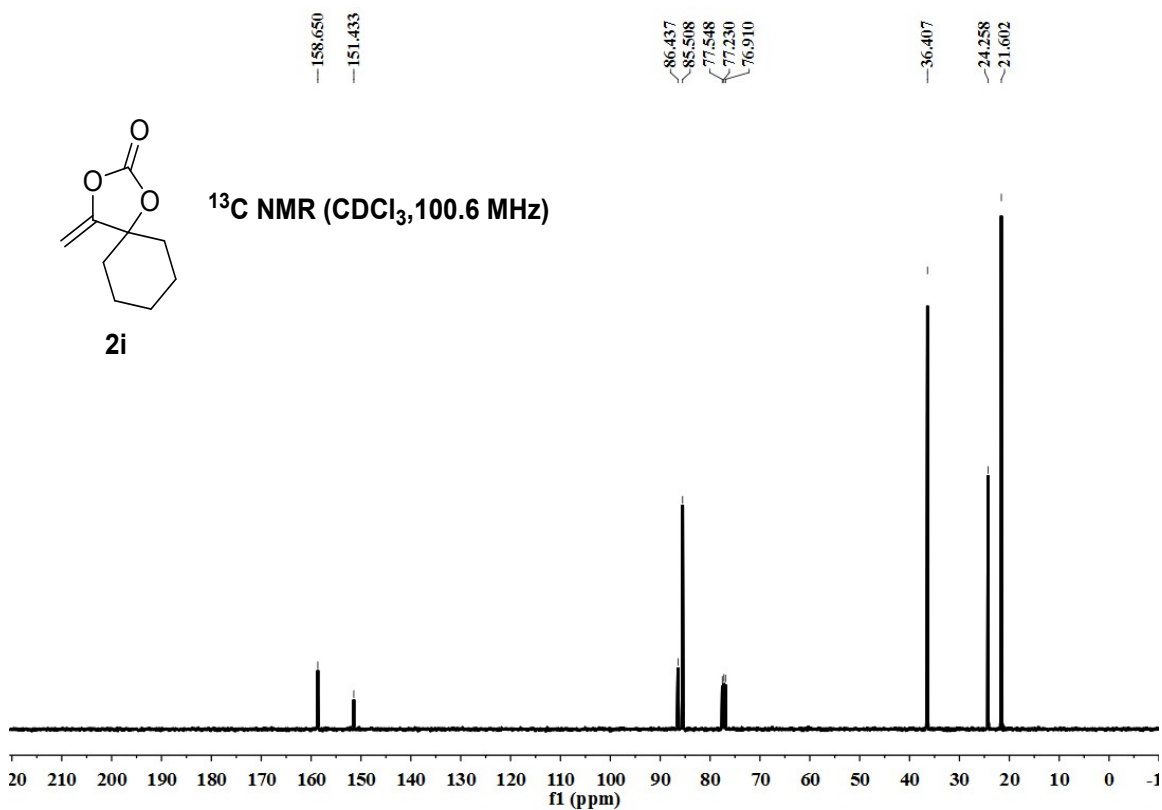

Supplement: c9cc07043e1.pdf [file c9cc07043e1.pdf]
